# Supplementary material for: The safety of cardioselective β1-blockers in asthma: literature review and search of global pharmacovigilance safety reports
Source: PubMed Central journal article supplement — ERJ Open Res. 2021 Mar 1;7(1):00801-2020. doi: 10.1183/23120541.00801-2020 (PMC7917232; doi:10.1183/23120541.00801-2020), 2021-03-01
Supplement: 00801-2020.SUPPLEMENT.pdf [file 00801-2020.SUPPLEMENT.pdf]

**Summary of publications considered in the literature review.**

| <b>AUTHOR</b>                             | <b>YEAR</b> | <b>BETA-BLOCKER</b>                                                          | <b>Number of people with asthma included</b> | <b>POPULATION</b>          |
|-------------------------------------------|-------------|------------------------------------------------------------------------------|----------------------------------------------|----------------------------|
| <i>Meta-analysis or systematic review</i> |             |                                                                              |                                              |                            |
| SALPETER                                  | 2002        | Beta-blockers (cardio-selective)                                             |                                              | Reactive airway disease    |
| MORALES                                   | 2016        | Beta-blockers (unspecified)                                                  |                                              | Asthma                     |
| MORALES                                   | 2014        | Beta-blockers (unspecified)                                                  |                                              | Asthma                     |
| SALPETER                                  | 2002        | Beta-blockers (cardio-selective)                                             |                                              | Reversible airways disease |
| <i>Randomised control trial</i>           |             |                                                                              |                                              |                            |
| DOROW                                     | 1986        | Celiprolol                                                                   | 66                                           | Reversible airways disease |
| DUNN                                      | 1986        | Timolol, betaxolol                                                           | 24                                           | Asthma                     |
| FORMGREN                                  | 1976        | Metoprolol, practolol                                                        | 17                                           | Asthma                     |
| LAMMERS                                   | 1986        | Bisoprolol, Metoprolol                                                       | 8                                            | Asthma                     |
| SCHINDL                                   | 1986        | Celiprolol, Atenolol, Metoprolol                                             | 18                                           | Asthma                     |
| WILCOCKS                                  | 1986        | Metoprolol, bevantolol                                                       | 16                                           | Asthma                     |
| CLAGUE                                    | 1984        | Propranolol, metoprolol                                                      | 8                                            | Reversible airways disease |
| DECALMER                                  | 1978        | Atenolol, metoprolol, acebutolol, propranolol, oxprenolol, pindolol, timolol | 10                                           | Asthma                     |
| ASTROM                                    | 1975        | Atenolol, propranolol                                                        | 5                                            | Asthma                     |
| BENSON                                    | 1978        | Propranolol, pindolol, acebutolol, atenolol                                  | 12                                           | Asthma                     |
| BEUMER                                    | 1975        | Bunitrolol, practolol                                                        | 40                                           | Asthma                     |
| BOYE                                      | 1977        | Atenolol                                                                     | 10                                           | Asthma                     |
| CLAUZEL                                   | 1988        | Celiprolol                                                                   | 13                                           | Asthma                     |
| GROTH                                     | 1986        | ICI 141,292, atenolol                                                        | 12                                           | Asthma                     |
| JOHANSSON                                 | 1975        | Metoprolol, propranolol                                                      | 7                                            | Asthma                     |
| MUE                                       | 1979        | Metoprolol                                                                   | 24                                           | Asthma                     |
| RUFFIN                                    | 1979        | Propranolol, timolol, metoprolol                                             | 12                                           | Asthma                     |

|              |      |                                              |    |                          |
|--------------|------|----------------------------------------------|----|--------------------------|
| VAN DEN BERG | 1981 | Metoprolol                                   | 8  | Asthma                   |
| VILSVIK      | 1976 | Atenolol, practolol                          | 12 | Asthma                   |
| YAMAKAGE     | 2009 | Landiolol, esmolol                           | 60 | Asthma                   |
| BAUER        | 1992 | Timolol, butylamino-phenoxy-propanol-acetate | 12 | Asthma                   |
| BAUER        | 1994 | Metoprolol                                   | 18 | Asthma                   |
| CHATTERJEE   | 1986 | Bisoprolol, Atenolol                         | 12 | Asthma                   |
| CHODOSH      | 1988 | Dilevalol, metoprolol                        | 16 | Asthma                   |
| DOSHAN       | 1986 | Celiprolol, propranolol, atenolol            | 34 | Asthma                   |
| ELLIS        | 1981 | Atenolol, propranolol                        | 10 | Asthma                   |
| FALLIERS     | 1986 | Labetalol, metoprolol                        | 18 | Asthma                   |
| GREEFHORST   | 1981 | Atenolol, metoprolol, acebutolol             | 8  | Asthma                   |
| GREEFHORST   | 1982 | Metoprolol, acebutolol                       | 8  | Asthma                   |
| HEDNER       | 1989 | Atenolol, dilevalol                          | 8  | Asthma                   |
| JACKSON      | 1983 | Atenolol, labetalol                          | 11 | Asthma                   |
| LAMMERS      | 1984 | Bisoprolol, Metoprolol                       | 8  | Asthma                   |
| LAMMERS      | 1985 | Atenolol, bevantolol                         | 8  | Asthma                   |
| LAMMERS      | 1986 | Xamoterol, Atenolol                          | 11 | Asthma                   |
| LOFDAHL      | 1983 | Pafenolol, metoprolol                        | 7  | Asthma                   |
| LOFDAHL      | 1984 | Bevantolol, propranolol                      | 8  | Asthma                   |
| LOFDAHL      | 1988 | Metoprolol, atenolol                         | 8  | Asthma                   |
| MATTHYS      | 1985 | Celiprolol, propranolol                      | 12 | Asthma                   |
| PHILIP-JOET  | 1986 | Metoprolol, Bevantolol                       | 7  | Asthma                   |
| PUJET        | 1992 | Celiprolol, propranolol, bisoprolol          | 10 | Asthma                   |
| RUFFIN       | 1982 | Propranolol, pindolol, atenolol              | 12 | Asthma                   |
| SCHOENE      | 1984 | Betaxolol, timolol                           | 9  | Reactive airways disease |
| SHAPPARD     | 1986 | Esmolol                                      | 10 | Asthma                   |
| VAN ZYL      | 1989 | Celiprolol, atenolol                         | 10 | Asthma                   |
| SHORT        | 2014 | Propranolol, esmolol                         | 12 | Asthma                   |
| CARLSON      | 1978 | Metoprolol, atenolol                         | 20 | Asthma                   |
| DOROW        | 1982 | Propranolol, pindolol, metoprolol            | 10 | Asthma                   |
| ELLIS        | 1984 | Atenolol, metoprolol                         | 8  | Asthma                   |

|                             |      |                                               |        |                          |
|-----------------------------|------|-----------------------------------------------|--------|--------------------------|
| LARSSON                     | 1982 | Labetalol, propranol, practolol               | 14     | Asthma                   |
| LAWRENCE                    | 1982 | Atenolol, metoprolol                          | 14     | Asthma                   |
| LOFDAHL                     | 1981 | Atenolol, metoprolol                          | 8      | Asthma                   |
| SKINNER                     | 1975 | Propranolol, acebutolol                       | 10     | Asthma                   |
| CAZZOLA                     | 2000 | Nebivolol, celiprolol                         | 12     | Asthma                   |
| <i>Non-randomised trial</i> |      |                                               |        |                          |
| HANANIA                     | 2008 | Nadolol                                       | 10     | Asthma                   |
| JONES                       | 1972 | Propranolol                                   | 6      | Asthma                   |
| KOTLYAR                     | 2002 | Carvedilol                                    | 12     | Asthma                   |
| KRAUSS                      | 1984 | Atenolol                                      | 14     | Asthma                   |
| LAMMERS                     | 1988 | Atenolol                                      | 11     | Asthma                   |
| LATIMER                     | 1990 | Propranolol                                   | 31     | Asthma                   |
| MATTSON                     | 1978 | Pindolol                                      | 8      | Asthma                   |
| RYO                         | 1976 | Propranolol, practolol, isoproterenol         | 15     | Asthma                   |
| SINGH                       | 1976 | Metoprolol, tolamolol, propranolol, practolol | 12     | Asthma                   |
| HANANIA                     | 2010 | Nadolol                                       | 10     | Asthma                   |
| BRAAT                       | 1991 | Metoprolol                                    | 7      | Asthma                   |
| BUSKIRK                     | 1986 | Ocular betaxolol                              | 11     | Asthma                   |
| FORMGREN                    | 1975 | Practolol                                     | 29     | Asthma                   |
| BARNETT                     | 2005 | Beta-blockers (unspecified)                   | 8,390  | Asthma, COPD             |
| BROOKS                      | 2007 | Beta-blockers (unspecified)                   | 11,592 | Asthma, COPD             |
| CHEN                        | 2001 | Beta-blockers (unspecified)                   | 9510   | Asthma, COPD             |
| EVANS                       | 1996 | Beta-blockers (unspecified)                   | 274    | Asthma                   |
| GRAFT                       | 1992 | Beta-blockers (unspecified)                   | 3,170  | Asthma                   |
| JONES                       | 1999 | Beta-blockers (unspecified)                   | 1      | Asthma                   |
| KAISERMAN                   | 2009 | Timolol, betaxolol                            | 693    | Obstructive lung disease |
| MOOSS                       | 1994 | Esmolol                                       | 31     | Asthma, COPD             |
| MORALES                     | 2011 | Beta-blockers (unspecified)                   | 1,527  | Asthma                   |
| MORALES                     | 2017 | Beta-blockers (unspecified)                   | 35,502 | Asthma                   |
| OLENCHOCK                   | 2009 | Beta-blockers (unspecified)                   | 12,967 | Reactive airways disease |
| PATERSON                    | 1987 | Beta-blockers (unspecified)                   | 12     | Asthma                   |

|                          |      |                                  |        |                            |
|--------------------------|------|----------------------------------|--------|----------------------------|
| PINTO                    | 2018 | Beta-blockers (unspecified)      | 8922   | Asthma                     |
| SINHA                    | 2006 | Beta-blockers (unspecified)      | 5      | Asthma                     |
| SULTANA                  | 2019 | Atenolol, bisoprolol, metoprolol | 53     | Thunderstorm asthma        |
| VERHAMME                 | 2016 | Beta-blockers (unspecified)      | 10,934 | Asthma                     |
| LOOP                     | 2019 | Beta-blockers (unspecified)      | 2341   | Asthma                     |
| SCHMID                   | 2015 | Beta-blockers (unspecified)      | 815    | Asthma                     |
| CRITCHLEY                | 2013 | Nebivolol                        | 13     | Asthma                     |
| <i>Literature review</i> |      |                                  |        |                            |
| DOROW                    | 1988 | Celiprolol                       |        | Reversible airways disease |
| ARBOE                    | 2013 | Beta-blockers (unspecified)      |        | Asthma                     |
| BOND                     | 2007 | Beta-blockers (unspecified)      |        | Asthma                     |
| CHAFIN                   | 1999 | Beta-blockers (unspecified)      |        | Asthma                     |
| COVAR                    | 2005 | Beta-blockers (unspecified)      |        | Asthma                     |
| HANANIA                  | 2010 | Beta-blockers (unspecified)      |        | Asthma                     |
| ORMISTON                 | 2003 | Beta-blockers (unspecified)      |        | Obstructive airway disease |
| SELF                     | 2011 | Carvedilol                       |        | Asthma                     |
| SELF                     | 2012 | Beta-blockers (cardio-selective) |        | Asthma                     |
| TATTERSFIELD             | 1991 | Beta-blockers (unspecified)      |        | Asthma                     |
| TIOTIU                   | 2019 | Beta-blockers (unspecified)      |        | Asthma                     |
| LEWIS                    | 1993 | Beta-blockers (unspecified)      |        |                            |
| <i>Other</i>             |      |                                  |        |                            |
| ANDERSON                 | 1979 | Metoprolol, Oxprenolol           | 2      | Asthma                     |
| BEVAN                    | 1992 | Metoprolol                       | 1      | Asthma                     |
| DIAL                     | 1982 | Metoprolol                       | 2      | Asthma                     |
| DUGGAL                   | 2006 | Esmolol                          | 1      | Asthma                     |
| MIKI                     | 2003 | Betaxolol                        | 1      | Asthma                     |
| NAGAOKA                  | 2014 | Landiolol                        | 1      | Asthma                     |
| WEINREB                  | 1988 | Betaxolol                        | 1      | Asthma                     |
| WEINSTEIN                | 1985 | Atenolol                         | 1      | Asthma                     |
| ASHRAFIAN                | 2005 | Beta-blockers (unspecified)      |        | Asthma, COPD               |
| LIPWORTH                 | 2009 | Beta-blockers (unspecified)      |        | Asthma                     |

|                |      |                                              |              |
|----------------|------|----------------------------------------------|--------------|
| KUIPERS        | 2018 | Beta-blockers (non-selective)                | Asthma, COPD |
| BOSKABADY      | 2004 | Propranolol                                  | Asthma       |
| KAMEDA         | 1986 | Labetalol                                    | Asthma       |
| NAKAGOSHI      | 1987 | Befunolol, carteolol                         | Asthma       |
| BOSKABADY      | 2006 | Propranolol                                  | Asthma       |
| SHAUKAT        | 2012 | Celiprolol                                   | Asthma       |
| ABUELEZZ       | 2018 | Nebivolol                                    | Asthma       |
| GATTO          | 1987 | Beta-blockers (unspecified)                  | Asthma       |
| NGUYEN         | 2008 | Nadolol                                      | Asthma       |
| LIN            | 2008 | Metoprolol, ICI118,551                       | Asthma       |
| NGUYEN         | 2009 | Alprenolol                                   | Asthma       |
| NGUYEN         | 2012 | Nadolol                                      | Asthma       |
| THANAWALA      | 2015 | Alprenolol, carvedilol, propranolol, nadolol | Asthma       |
| CALLAERTS-VEGH | 2004 | Carvedilol, nadolol, alprenolol              | Asthma       |
| BAKER          | 2017 | NDD-713 and NDD-825                          | Asthma       |
| LIPWORTH       | 2016 | Propranolol, nadolol                         | Asthma       |
| RANK           | 2008 | Beta-blockers (unspecified)                  | Asthma       |
